# Supplementary material for: Small RNA Profiles of the Rice PTGMS Line Wuxiang S Reveal miRNAs Involved in Fertility Transition
Source: Front Plant Sci. 2016 Apr 20;7:514. doi: 10.3389/fpls.2016.00514 (PMC4837141; doi:10.3389/fpls.2016.00514)
Supplement: Table S5 — Comparison of the expression levels for the known miRNAs between WXS (S) and WXS (F) (SP2—FP2 and SP3—FP3). [file Table5.XLSX]

## Sheet: Sheet1
Table S5 Comparison of the expression levels for the known miRNAs between WXS(S) and WXS(F).
Table S5-1 Comparison of the expression levels for the known miRNAs between FP2 and SP2.												Table S5-2 Comparison of the expression levels for the known miRNAs between FP3 and SP3.												Table S5-3 Comparison of the expression levels for the known miRNAs between WXS(S) and WXS(F).
pairwise	miR-name	FP2-total-reads	SP2-total-reads	FP2-expressed	SP2-expressed	FP2-std	SP2-std	fold-change(log2 SP2/FP2)	p-value	sig-lable		pairwise	miR-name	FP3-total-reads	SP3-total-reads	FP3-expressed	SP3-expressed	FP3-std	SP3-std	fold-change(log2 SP3/FP3)	p-value	sig-lable		miR-name	FP2-total-reads	SP2-total-reads	FP3-total-reads	SP3-total-reads	FP2-expressed	SP2-expressed	FP3-expressed	SP3-expressed	FP2-std	SP2-std	FP3-std	SP3-std	fold-change(log2 SP2/FP2)	fold-change(log2 SP3/FP3)	p-value（SP2 vs FP2）	p-value（SP3 vs FP3）	sig-lable(SP2 vs FP2)	sig-lable(SP3 vs FP3)
FP2-SP2	osa-miR1423-3p	17869357	8252111	1328	869	74.3172	105.306	0.502825	3.20296e-15			FP3-SP3	osa-miR1423-3p	7798691	5851620	616	656	78.9876	112.106	0.505162	4.40236e-10			osa-miR1423-5p	17869357	8252111	7798691	5851620	2047	2425	774	1521	114.554	293.864	99.2474	259.928	1.35913	1.38901	3.48796e-214	9.07026e-113	**	**
FP2-SP2	osa-miR164d	17869357	8252111	12	13	0.6715	1.5754	1.23026	0.0305639	*		FP3-SP3	osa-miR1423-5p	7798691	5851620	774	1521	99.2474	259.928	1.38901	9.07026e-113	**		osa-miR156a	17869357	8252111	7798691	5851620	87	14	28	9	4.8687	1.6965	3.5903	1.538	-1.52098	-1.22305	5.38918e-05	0.0225513	**	*
FP2-SP2	osa-miR1425-5p	17869357	8252111	11026	5106	617.034	618.751	0.0040085	0.866377			FP3-SP3	osa-miR1425-5p	7798691	5851620	6200	3926	795.005	670.925	-0.244812	5.97737e-17			osa-miR156b-5p	17869357	8252111	7798691	5851620	86	14	28	9	4.8127	1.6965	3.5903	1.538	-1.50429	-1.22305	6.83237e-05	0.0225513	**	*
FP2-SP2	osa-miR1429-5p	17869357	8252111	28	21	1.5669	2.5448	0.699639	0.0879848			FP3-SP3	osa-miR1429-5p	7798691	5851620	16	12	2.0516	2.0507	-0.00063302	0.972407			osa-miR156c-5p	17869357	8252111	7798691	5851620	86	14	28	9	4.8127	1.6965	3.5903	1.538	-1.50429	-1.22305	6.83237e-05	0.0225513	**	*
FP2-SP2	osa-miR167h-3p	17869357	8252111	18	1	1.0073	0.1212	-3.05503	0.0103131	*		FP3-SP3	osa-miR156a	7798691	5851620	28	9	3.5903	1.538	-1.22305	0.0225513	*		osa-miR156d	17869357	8252111	7798691	5851620	154	36	67	17	8.6181	4.3625	8.5912	2.9052	-0.982215	-1.56422	0.000107601	1.53287e-05		**
FP2-SP2	osa-miR169c	17869357	8252111	18	2	1.0073	0.2424	-2.05503	0.0382407	*		FP3-SP3	osa-miR156b-5p	7798691	5851620	28	9	3.5903	1.538	-1.22305	0.0225513	*		osa-miR156e	17869357	8252111	7798691	5851620	87	14	28	9	4.8687	1.6965	3.5903	1.538	-1.52098	-1.22305	5.38918e-05	0.0225513	**	*
FP2-SP2	osa-miR395i	17869357	8252111	11	12	0.6156	1.4542	1.24016	0.0361595	*		FP3-SP3	osa-miR156c-5p	7798691	5851620	28	9	3.5903	1.538	-1.22305	0.0225513	*		osa-miR156f-5p	17869357	8252111	7798691	5851620	153	36	66	17	8.5621	4.3625	8.463	2.9052	-0.97281	-1.54253	0.000128379	2.1605e-05		**
FP2-SP2	osa-miR156d	17869357	8252111	154	36	8.6181	4.3625	-0.982215	0.000107601			FP3-SP3	osa-miR156d	7798691	5851620	67	17	8.5912	2.9052	-1.56422	1.53287e-05	**		osa-miR156g-5p	17869357	8252111	7798691	5851620	86	14	28	9	4.8127	1.6965	3.5903	1.538	-1.50429	-1.22305	6.83237e-05	0.0225513	**	*
FP2-SP2	osa-miR5082	17869357	8252111	31	5	1.7348	0.6059	-1.51762	0.0207443	*		FP3-SP3	osa-miR156e	7798691	5851620	28	9	3.5903	1.538	-1.22305	0.0225513	*		osa-miR156h-5p	17869357	8252111	7798691	5851620	153	36	66	17	8.5621	4.3625	8.463	2.9052	-0.97281	-1.54253	0.000128379	2.1605e-05		**
FP2-SP2	osa-miR156f-5p	17869357	8252111	153	36	8.5621	4.3625	-0.97281	0.000128379			FP3-SP3	osa-miR156f-5p	7798691	5851620	66	17	8.463	2.9052	-1.54253	2.1605e-05	**		osa-miR156i	17869357	8252111	7798691	5851620	87	14	28	9	4.8687	1.6965	3.5903	1.538	-1.52098	-1.22305	5.38918e-05	0.0225513	**	*
FP2-SP2	osa-miR5505	17869357	8252111	14	14	0.7835	1.6965	1.11456	0.0381439	*		FP3-SP3	osa-miR156g-5p	7798691	5851620	28	9	3.5903	1.538	-1.22305	0.0225513	*		osa-miR156j-5p	17869357	8252111	7798691	5851620	153	36	66	17	8.5621	4.3625	8.463	2.9052	-0.97281	-1.54253	0.000128379	2.1605e-05		**
FP2-SP2	osa-miR156h-5p	17869357	8252111	153	36	8.5621	4.3625	-0.97281	0.000128379			FP3-SP3	osa-miR156h-5p	7798691	5851620	66	17	8.463	2.9052	-1.54253	2.1605e-05	**		osa-miR159c	17869357	8252111	7798691	5851620	19	25	5	14	1.0633	3.0295	0.6411	2.3925	1.51053	1.8999	0.000509444	0.00733811	**	**
FP2-SP2	osa-miR1423-5p	17869357	8252111	2047	2425	114.554	293.864	1.35913	3.48796e-214	**		FP3-SP3	osa-miR156i	7798691	5851620	28	9	3.5903	1.538	-1.22305	0.0225513	*		osa-miR159d	17869357	8252111	7798691	5851620	19	27	5	14	1.0633	3.2719	0.6411	2.3925	1.62158	1.8999	0.000141206	0.00733811	**	**
FP2-SP2	osa-miR156j-5p	17869357	8252111	153	36	8.5621	4.3625	-0.97281	0.000128379			FP3-SP3	osa-miR156j-5p	7798691	5851620	66	17	8.463	2.9052	-1.54253	2.1605e-05	**		osa-miR159e	17869357	8252111	7798691	5851620	19	25	5	14	1.0633	3.0295	0.6411	2.3925	1.51053	1.8999	0.000509444	0.00733811	**	**
FP2-SP2	osa-miR159a.1	17869357	8252111	23530	14280	1316.78	1730.47	0.394147	9.77461e-143			FP3-SP3	osa-miR159a.1	7798691	5851620	10577	5541	1356.25	946.917	-0.518316	1.90945e-107			osa-miR164d	17869357	8252111	7798691	5851620	12	13	13	21	0.6715	1.5754	1.6669	3.5887	1.23026	1.10629	0.0305639	0.0272621	*	*
FP2-SP2	osa-miR159a.2	17869357	8252111	305	136	17.0683	16.4806	-0.0505506	0.752829			FP3-SP3	osa-miR159a.2	7798691	5851620	99	60	12.6944	10.2536	-0.308062	0.195239			osa-miR166e-3p	17869357	8252111	7798691	5851620	124	28	24	14	6.9393	3.3931	3.0774	2.3925	-1.03219	-0.363193	0.000310792	0.475707	**
FP2-SP2	osa-miR159b	17869357	8252111	23527	14280	1316.61	1730.47	0.394331	7.35496e-143			FP3-SP3	osa-miR159b	7798691	5851620	10579	5541	1356.51	946.917	-0.518589	1.44646e-107			osa-miR166h-5p	17869357	8252111	7798691	5851620	4051	1211	1451	448	226.701	146.75	186.057	76.56	-0.627427	-1.28108	4.00235e-43	5.39482e-69		**
FP2-SP2	osa-miR156a	17869357	8252111	87	14	4.8687	1.6965	-1.52098	5.38918e-05	**		FP3-SP3	osa-miR159c	7798691	5851620	5	14	0.6411	2.3925	1.8999	0.00733811	**		osa-miR166k-5p	17869357	8252111	7798691	5851620	3622	934	939	327	202.693	113.183	120.405	55.882	-0.840639	-1.10744	6.55358e-63	2.36026e-36		**
FP2-SP2	osa-miR156b-5p	17869357	8252111	86	14	4.8127	1.6965	-1.50429	6.83237e-05	**		FP3-SP3	osa-miR159d	7798691	5851620	5	14	0.6411	2.3925	1.8999	0.00733811	**		osa-miR167c-3p	17869357	8252111	7798691	5851620	31	25	14	23	1.7348	3.0295	1.7952	3.9305	0.80431	1.13057	0.036823	0.0186939		*
FP2-SP2	osa-miR156c-5p	17869357	8252111	86	14	4.8127	1.6965	-1.50429	6.83237e-05	**		FP3-SP3	osa-miR159e	7798691	5851620	5	14	0.6411	2.3925	1.8999	0.00733811	**		osa-miR167h-3p	17869357	8252111	7798691	5851620	18	1	14	7	1.0073	0.1212	1.7952	1.1962	-3.05503	-0.585686	0.0103131	0.408015	*
FP2-SP2	osa-miR159f	17869357	8252111	12590	7372	704.558	893.347	0.342502	1.11508e-57			FP3-SP3	osa-miR159f	7798691	5851620	4490	2097	575.738	358.362	-0.683993	2.28414e-75			osa-miR169c	17869357	8252111	7798691	5851620	18	2	7	10	1.0073	0.2424	0.8976	1.7089	-2.05503	0.928923	0.0382407	0.186234	*
FP2-SP2	osa-miR160a-3p	17869357	8252111	46	11	2.5742	1.333	-0.949447	0.0466583			FP3-SP3	osa-miR160a-3p	7798691	5851620	28	11	3.5903	1.8798	-0.933525	0.0669996			osa-miR171a	17869357	8252111	7798691	5851620	32	21	15	25	1.7908	2.5448	1.9234	4.2723	0.506948	1.15135	0.197059	0.0128443		*
FP2-SP2	osa-miR160a-5p	17869357	8252111	1064	497	59.5433	60.227	0.0164712	0.823328			FP3-SP3	osa-miR160a-5p	7798691	5851620	525	520	67.319	88.8643	0.40059	7.35293e-06			osa-miR171c-5p	17869357	8252111	7798691	5851620	163	16	40	8	9.1218	1.9389	5.1291	1.3671	-2.23408	-1.90759	6.58058e-13	0.000146243	**	**
FP2-SP2	osa-miR160b-3p	17869357	8252111	46	11	2.5742	1.333	-0.949447	0.0466583			FP3-SP3	osa-miR160b-3p	7798691	5851620	28	11	3.5903	1.8798	-0.933525	0.0669996			osa-miR171e-5p	17869357	8252111	7798691	5851620	420	98	135	38	23.5039	11.8757	17.3106	6.4939	-0.984888	-1.4145	9.95599e-11	9.53819e-09		**
FP2-SP2	osa-miR160b-5p	17869357	8252111	1066	496	59.6552	60.1058	0.0108563	0.879433			FP3-SP3	osa-miR160b-5p	7798691	5851620	526	519	67.4472	88.6934	0.395068	9.81277e-06			osa-miR171i-5p	17869357	8252111	7798691	5851620	666	88	256	110	37.2705	10.6639	32.826	18.7982	-1.8053	-0.804244	1.33635e-37	4.93364e-07	**
FP2-SP2	osa-miR160c-5p	17869357	8252111	1065	497	59.5992	60.227	0.0151174	0.836766			FP3-SP3	osa-miR160c-5p	7798691	5851620	525	520	67.319	88.8643	0.40059	7.35293e-06			osa-miR172d-5p	17869357	8252111	7798691	5851620	35	14	8	17	1.9587	1.6965	1.0258	2.9052	-0.207335	1.50189	0.705799	0.0120382		*
FP2-SP2	osa-miR160d-5p	17869357	8252111	1048	483	58.6479	58.5305	-0.00289085	0.981702			FP3-SP3	osa-miR160d-5p	7798691	5851620	517	502	66.2932	85.7882	0.371918	3.96407e-05			osa-miR1846a-5p	17869357	8252111	7798691	5851620	74	74	50	33	4.1412	8.9674	6.4113	5.6395	1.11464	-0.18505	3.0612e-06	0.582913	**
FP2-SP2	osa-miR160e-3p	17869357	8252111	38	9	2.1265	1.0906	-0.963359	0.0700628			FP3-SP3	osa-miR160e-3p	7798691	5851620	11	3	1.4105	0.5127	-1.46002	0.118886			osa-miR1846b-5p	17869357	8252111	7798691	5851620	73	74	49	32	4.0852	8.9674	6.2831	5.4686	1.13428	-0.200305	2.19952e-06	0.556634	**
FP2-SP2	osa-miR160e-5p	17869357	8252111	2961	1334	165.703	161.656	-0.0356736	0.457572			FP3-SP3	osa-miR160e-5p	7798691	5851620	1461	1329	187.339	227.117	0.277781	3.97007e-07			osa-miR1846c-5p	17869357	8252111	7798691	5851620	58	57	40	23	3.2458	6.9073	5.1291	3.9305	1.08955	-0.383993	5.68194e-05	0.320239	**
FP2-SP2	osa-miR160f-3p	17869357	8252111	58	16	3.2458	1.9389	-0.743336	0.0674415			FP3-SP3	osa-miR160f-3p	7798691	5851620	21	8	2.6928	1.3671	-0.977988	0.102855			osa-miR1862e	17869357	8252111	7798691	5851620	118	29	89	25	6.6035	3.5143	11.4122	4.2723	-0.909994	-1.41749	0.00153096	3.29943e-06		**
FP2-SP2	osa-miR160f-5p	17869357	8252111	171	74	9.5695	8.9674	-0.0937538	0.664331			FP3-SP3	osa-miR160f-5p	7798691	5851620	88	74	11.2839	12.6461	0.164427	0.463192			osa-miR1871	17869357	8252111	7798691	5851620	43	6	9	8	2.4064	0.7271	1.154	1.3671	-1.72665	0.244476	0.00240731	0.702712	**
FP2-SP2	osa-miR162a	17869357	8252111	2097	495	117.352	59.9847	-0.968172	1.86957e-46			FP3-SP3	osa-miR162a	7798691	5851620	591	401	75.7819	68.528	-0.14516	0.120464			osa-miR1878	17869357	8252111	7798691	5851620	106	15	45	15	5.9319	1.8177	5.7702	2.5634	-1.70638	-1.17056	1.23224e-06	0.00469807	**	**
FP2-SP2	osa-miR162b	17869357	8252111	408	162	22.8324	19.6313	-0.217927	0.105316			FP3-SP3	osa-miR162b	7798691	5851620	114	159	14.6178	27.172	0.894395	3.42184e-07			osa-miR1880	17869357	8252111	7798691	5851620	95	62	20	32	5.3164	7.5132	2.5645	5.4686	0.498978	1.09249	0.0338744	0.00693713		**
FP2-SP2	osa-miR164a	17869357	8252111	539	401	30.1634	48.5936	0.687967	1.01701e-12			FP3-SP3	osa-miR164a	7798691	5851620	765	632	98.0934	108.004	0.138861	0.0731496			osa-miR1883a	17869357	8252111	7798691	5851620	1926	1895	895	908	107.782	229.638	114.763	155.171	1.09124	0.435201	5.97247e-118	1.58503e-10	**
FP2-SP2	osa-miR164b	17869357	8252111	540	401	30.2193	48.5936	0.685296	1.21719e-12			FP3-SP3	osa-miR164b	7798691	5851620	765	635	98.0934	108.517	0.145693	0.0598185			osa-miR1883b	17869357	8252111	7798691	5851620	518	480	139	206	28.9882	58.1669	17.8235	35.2039	1.00473	0.981955	2.04414e-27	3.40598e-10	**
FP2-SP2	osa-miR156e	17869357	8252111	87	14	4.8687	1.6965	-1.52098	5.38918e-05	**		FP3-SP3	osa-miR164c	7798691	5851620	8	4	1.0258	0.6836	-0.585525	0.555666			osa-miR2106	17869357	8252111	7798691	5851620	200	51	110	35	11.1923	6.1802	14.1049	5.9812	-0.856781	-1.23769	7.69868e-05	2.98783e-06		**
FP2-SP2	osa-miR164f	17869357	8252111	541	404	30.2753	48.9572	0.69338	5.80626e-13			FP3-SP3	osa-miR164d	7798691	5851620	13	21	1.6669	3.5887	1.10629	0.0272621	*		osa-miR2121a	17869357	8252111	7798691	5851620	86	13	21	16	4.8127	1.5754	2.6928	2.7343	-1.61113	0.0220645	2.89727e-05	0.938963	**
FP2-SP2	osa-miR166a-3p	17869357	8252111	682455	183098	38191.4	22188	-0.783465	0			FP3-SP3	osa-miR164f	7798691	5851620	765	633	98.0934	108.175	0.141142	0.0684555			osa-miR2121b	17869357	8252111	7798691	5851620	86	13	21	16	4.8127	1.5754	2.6928	2.7343	-1.61113	0.0220645	2.89727e-05	0.938963	**
FP2-SP2	osa-miR166a-5p	17869357	8252111	389	141	21.7691	17.0865	-0.349425	0.0130505			FP3-SP3	osa-miR166a-3p	7798691	5851620	131336	84814	16840.8	14494.1	-0.216492	7.57454e-257			osa-miR2275c	17869357	8252111	7798691	5851620	109	33	58	21	6.0998	3.999	7.4371	3.5887	-0.609123	-1.05128	0.0319008	0.0031027		**
FP2-SP2	osa-miR166b-3p	17869357	8252111	680990	182703	38109.4	22140.2	-0.783481	0			FP3-SP3	osa-miR166a-5p	7798691	5851620	137	65	17.5671	11.108	-0.661277	0.00198464			osa-miR2871a-5p	17869357	8252111	7798691	5851620	54	11	21	12	3.0219	1.333	2.6928	2.0507	-1.18078	-0.392991	0.00953077	0.475161	**
FP2-SP2	osa-miR166b-5p	17869357	8252111	1021	389	57.1369	47.1395	-0.277486	0.00112473			FP3-SP3	osa-miR166b-3p	7798691	5851620	131009	84610	16798.8	14459.2	-0.21637	6.15398e-256			osa-miR319a-3p	17869357	8252111	7798691	5851620	442	211	178	40	24.7351	25.5692	22.8243	6.8357	0.0478473	-1.73941	0.677551	1.88336e-14		**
FP2-SP2	osa-miR166c-3p	17869357	8252111	670321	177005	37512.3	21449.7	-0.806409	0			FP3-SP3	osa-miR166b-5p	7798691	5851620	609	255	78.09	43.5777	-0.841548	6.51445e-16			osa-miR395i	17869357	8252111	7798691	5851620	11	12	7	9	0.6156	1.4542	0.8976	1.538	1.24016	0.776911	0.0361595	0.278762	*
FP2-SP2	osa-miR166c-5p	17869357	8252111	30	7	1.6789	0.8483	-0.98487	0.106509			FP3-SP3	osa-miR166c-3p	7798691	5851620	123407	78825	15824.1	13470.6	-0.232303	3.97696e-276			osa-miR3979-3p	17869357	8252111	7798691	5851620	10	49	3	38	0.5596	5.9379	0.3847	6.4939	3.40748	4.07728	3.53659e-16	2.03919e-11	**	**
FP2-SP2	osa-miR166d-3p	17869357	8252111	682458	183096	38191.5	22187.8	-0.783487	0			FP3-SP3	osa-miR166c-5p	7798691	5851620	35	16	4.4879	2.7343	-0.714869	0.101268			osa-miR3979-5p	17869357	8252111	7798691	5851620	36	76	13	107	2.0146	9.2098	1.6669	18.2855	2.19268	3.45546	3.55376e-15	2.77363e-26	**	**
FP2-SP2	osa-miR166d-5p	17869357	8252111	296	126	16.5647	15.2688	-0.117525	0.457516			FP3-SP3	osa-miR166d-3p	7798691	5851620	131335	84812	16840.6	14493.8	-0.216515	6.74868e-257			osa-miR397b	17869357	8252111	7798691	5851620	31	34	18	22	1.7348	4.1202	2.3081	3.7596	1.24795	0.703873	0.000491539	0.121653	**
FP2-SP2	osa-miR156g-5p	17869357	8252111	86	14	4.8127	1.6965	-1.50429	6.83237e-05	**		FP3-SP3	osa-miR166d-5p	7798691	5851620	188	84	24.1066	14.355	-0.747875	5.28649e-05			osa-miR398b	17869357	8252111	7798691	5851620	166	486	105	323	9.2896	58.894	13.4638	55.1984	2.66443	2.03554	4.17874e-112	1.09208e-42	**	**
FP2-SP2	osa-miR166e-5p	17869357	8252111	388	140	21.7131	16.9654	-0.35597	0.0116422			FP3-SP3	osa-miR166e-3p	7798691	5851620	24	14	3.0774	2.3925	-0.363193	0.475707			osa-miR399d	17869357	8252111	7798691	5851620	17	52	10	53	0.9513	6.3014	1.2823	9.0573	2.7277	2.82035	8.68397e-14	1.76957e-11	**	**
FP2-SP2	osa-miR166f	17869357	8252111	682271	183044	38181.1	22181.5	-0.783502	0			FP3-SP3	osa-miR166e-5p	7798691	5851620	149	65	19.1058	11.108	-0.782412	0.000186299			osa-miR399j	17869357	8252111	7798691	5851620	18	29	11	41	1.0073	3.5143	1.4105	7.0066	1.80274	2.31251	2.0656e-05	1.40739e-07	**	**
FP2-SP2	osa-miR166g-3p	17869357	8252111	44678	19946	2500.26	2417.08	-0.0488125	6.90487e-05			FP3-SP3	osa-miR166f	7798691	5851620	131281	84788	16833.7	14489.7	-0.21633	2.2484e-256			osa-miR408-3p	17869357	8252111	7798691	5851620	317	600	251	597	17.7399	72.7087	32.1849	102.023	2.03513	1.66444	6.09031e-98	6.18349e-59	**	**
FP2-SP2	osa-miR166h-3p	17869357	8252111	31936	13610	1787.19	1649.28	-0.115864	3.1596e-15			FP3-SP3	osa-miR166g-3p	7798691	5851620	20047	13618	2570.56	2327.22	-0.143476	2.68197e-19			osa-miR439i	17869357	8252111	7798691	5851620	8	13	8	7	0.4477	1.5754	1.0258	1.1962	1.81511	0.221709	0.00394838	0.738933	**
FP2-SP2	osa-miR166h-5p	17869357	8252111	4051	1211	226.701	146.75	-0.627427	4.00235e-43			FP3-SP3	osa-miR166h-3p	7798691	5851620	10953	7270	1404.47	1242.39	-0.176903	4.11821e-16			osa-miR444f	17869357	8252111	7798691	5851620	46	58	23	67	2.5742	7.0285	2.9492	11.4498	1.44909	1.95693	3.3672e-07	1.38279e-09	**	**
FP2-SP2	osa-miR166i-3p	17869357	8252111	6533	2266	365.598	274.596	-0.412945	3.76504e-33			FP3-SP3	osa-miR166h-5p	7798691	5851620	1451	448	186.057	76.56	-1.28108	5.39482e-69	**		osa-miR5072	17869357	8252111	7798691	5851620	33	14	19	4	1.8467	1.6965	2.4363	0.6836	-0.122388	-1.83347	0.851484	0.0128629		*
FP2-SP2	osa-miR166j-3p	17869357	8252111	670035	176912	37496.3	21438.4	-0.806552	0			FP3-SP3	osa-miR166i-3p	7798691	5851620	2557	1114	327.875	190.375	-0.784307	6.44871e-55			osa-miR5083	17869357	8252111	7798691	5851620	235	29	28	38	13.151	3.5143	3.5903	6.4939	-1.90386	0.854981	4.39912e-15	0.0163826	**
FP2-SP2	osa-miR166k-3p	17869357	8252111	69287	34650	3877.42	4198.93	0.114923	1.85818e-33			FP3-SP3	osa-miR166i-5p	7798691	5851620	10	2	1.2823	0.3418	-1.90751	0.0755432			osa-miR528-3p	17869357	8252111	7798691	5851620	85	101	74	105	4.7567	12.2393	9.4888	17.9437	1.36349	0.91918	1.47988e-10	2.22827e-05	**
FP2-SP2	osa-miR166k-5p	17869357	8252111	3622	934	202.693	113.183	-0.840639	6.55358e-63			FP3-SP3	osa-miR166j-3p	7798691	5851620	123215	78747	15799.4	13457.3	-0.231485	7.38434e-274			osa-miR528-5p	17869357	8252111	7798691	5851620	199	392	137	267	11.1364	47.503	17.5671	45.6284	2.09274	1.37706	4.16775e-67	6.06667e-21	**	**
FP2-SP2	osa-miR166l-3p	17869357	8252111	74882	37392	4190.53	4531.2	0.112763	1.02537e-34			FP3-SP3	osa-miR166j-5p	7798691	5851620	9	3	1.154	0.5127	-1.17046	0.242494			osa-miR529b	17869357	8252111	7798691	5851620	17	11	3	10	0.9513	1.333	0.3847	1.7089	0.486704	2.15126	0.348427	0.0147627		*
FP2-SP2	osa-miR166l-5p	17869357	8252111	64	23	3.5816	2.7872	-0.361788	0.324176			FP3-SP3	osa-miR166k-3p	7798691	5851620	27819	20709	3567.14	3539.02	-0.0114167	0.388956			osa-miR530-5p	17869357	8252111	7798691	5851620	15	24	11	33	0.8394	2.9083	1.4105	5.6395	1.79275	1.99936	0.0001124	1.73059e-05	**	**
FP2-SP2	osa-miR166m	17869357	8252111	8257	3068	462.076	371.784	-0.313666	1.5891e-25			FP3-SP3	osa-miR166k-5p	7798691	5851620	939	327	120.405	55.882	-1.10744	2.36026e-36	**		osa-miR5508	17869357	8252111	7798691	5851620	81	30	85	24	4.5329	3.6354	10.8993	4.1014	-0.31832	-1.41005	0.321024	6.02343e-06		**
FP2-SP2	osa-miR167a-3p	17869357	8252111	16	10	0.8954	1.2118	0.436547	0.40999			FP3-SP3	osa-miR166l-3p	7798691	5851620	29640	21918	3800.64	3745.63	-0.0210334	0.101785			osa-miR5519	17869357	8252111	7798691	5851620	28	37	19	25	1.5669	4.4837	2.4363	4.2723	1.51678	0.810321	2.34476e-05	0.0627035	**
FP2-SP2	osa-miR167a-5p	17869357	8252111	510	164	28.5405	19.8737	-0.52215	3.68315e-05			FP3-SP3	osa-miR166l-5p	7798691	5851620	21	11	2.6928	1.8798	-0.518528	0.352706			osa-miR5794	17869357	8252111	7798691	5851620	54	13	38	11	3.0219	1.5754	4.8726	1.8798	-0.939738	-1.37411	0.0313498	0.00338755		**
FP2-SP2	osa-miR167b	17869357	8252111	502	164	28.0928	19.8737	-0.49934	8.447e-05			FP3-SP3	osa-miR166m	7798691	5851620	2050	1511	262.865	258.219	-0.0257242	0.601105			osa-miR5796	17869357	8252111	7798691	5851620	182	188	47	107	10.185	22.782	6.0267	18.2855	1.16145	1.60126	1.70164e-14	2.86534e-11	**	**
FP2-SP2	osa-miR167c-3p	17869357	8252111	31	25	1.7348	3.0295	0.80431	0.036823			FP3-SP3	osa-miR167a-3p	7798691	5851620	8	5	1.0258	0.8545	-0.263597	0.797317			osa-miR7693-3p	17869357	8252111	7798691	5851620	41	43	23	21	2.2944	5.2108	2.9492	3.5887	1.18339	0.283138	0.000177959	0.503587	**
FP2-SP2	osa-miR167c-5p	17869357	8252111	510	164	28.5405	19.8737	-0.52215	3.68315e-05			FP3-SP3	osa-miR167a-5p	7798691	5851620	227	156	29.1074	26.6593	-0.126747	0.403256			osa-miR7693-5p	17869357	8252111	7798691	5851620	41	49	23	12	2.2944	5.9379	2.9492	2.0507	1.37184	-0.524207	6.88712e-06	0.323501	**
FP2-SP2	osa-miR167d-5p	17869357	8252111	937	330	52.4361	39.9898	-0.390928	1.67757e-05			FP3-SP3	osa-miR167b	7798691	5851620	227	156	29.1074	26.6593	-0.126747	0.403256			osa-miR7694-3p	17869357	8252111	7798691	5851620	51	6	15	10	2.854	0.7271	1.9234	1.7089	-1.97276	-0.170591	0.000279487	0.805629	**
FP2-SP2	osa-miR167e-5p	17869357	8252111	297	154	16.6206	18.6619	0.167123	0.237113			FP3-SP3	osa-miR167c-3p	7798691	5851620	14	23	1.7952	3.9305	1.13057	0.0186939	*		osa-miR812a	17869357	8252111	7798691	5851620	47	32	14	22	2.6302	3.8778	1.7952	3.7596	0.560066	1.06643	0.0865895	0.0282246		*
FP2-SP2	osa-miR167f	17869357	8252111	937	330	52.4361	39.9898	-0.390928	1.67757e-05			FP3-SP3	osa-miR167c-5p	7798691	5851620	226	156	28.9792	26.6593	-0.120379	0.428089			osa-miR812b	17869357	8252111	7798691	5851620	49	29	12	21	2.7421	3.5143	1.5387	3.5887	0.357956	1.22175	0.272617	0.0169121		*
FP2-SP2	osa-miR167g	17869357	8252111	937	330	52.4361	39.9898	-0.390928	1.67757e-05			FP3-SP3	osa-miR167d-5p	7798691	5851620	563	291	72.1916	49.7298	-0.53772	1.58987e-07			osa-miR812d	17869357	8252111	7798691	5851620	45	29	10	19	2.5183	3.5143	1.2823	3.247	0.480787	1.34037	0.153113	0.0146986		*
FP2-SP2	osa-miR156i	17869357	8252111	87	14	4.8687	1.6965	-1.52098	5.38918e-05	**		FP3-SP3	osa-miR167e-5p	7798691	5851620	259	128	33.2107	21.8743	-0.602411	8.55343e-05			osa-miR812k	17869357	8252111	7798691	5851620	153	33	77	27	8.5621	3.999	9.8735	4.6141	-1.09833	-1.09751	2.39857e-05	0.000397581	**	**
FP2-SP2	osa-miR167h-5p	17869357	8252111	937	330	52.4361	39.9898	-0.390928	1.67757e-05			FP3-SP3	osa-miR167f	7798691	5851620	564	291	72.3198	49.7298	-0.54028	1.3712e-07			osa-miR812l	17869357	8252111	7798691	5851620	136	22	64	21	7.6108	2.666	8.2065	3.5887	-1.51337	-1.19331	3.96616e-07	0.000575208	**	**
FP2-SP2	osa-miR167i-5p	17869357	8252111	297	154	16.6206	18.6619	0.167123	0.237113			FP3-SP3	osa-miR167g	7798691	5851620	565	291	72.4481	49.7298	-0.542837	1.18192e-07			osa-miR812m	17869357	8252111	7798691	5851620	136	24	65	21	7.6108	2.9083	8.3347	3.5887	-1.38787	-1.21567	1.93486e-06	0.000429078	**	**
FP2-SP2	osa-miR167j	17869357	8252111	937	330	52.4361	39.9898	-0.390928	1.67757e-05			FP3-SP3	osa-miR167h-3p	7798691	5851620	14	7	1.7952	1.1962	-0.585686	0.408015			osa-miR815a	17869357	8252111	7798691	5851620	14	19	9	9	0.7835	2.3024	1.154	1.538	1.55513	0.414412	0.00190128	0.52658	**
FP2-SP2	osa-miR168a-3p	17869357	8252111	15586	9307	872.219	1127.83	0.37079	9.67322e-84			FP3-SP3	osa-miR167h-5p	7798691	5851620	563	291	72.1916	49.7298	-0.53772	1.58987e-07			osa-miR815c	17869357	8252111	7798691	5851620	17	24	10	10	0.9513	2.9083	1.2823	1.7089	1.6122	0.414334	0.000348741	0.506117	**
FP2-SP2	osa-miR168a-5p	17869357	8252111	36323	14835	2032.7	1797.72	-0.177226	5.13629e-37			FP3-SP3	osa-miR167i-5p	7798691	5851620	258	128	33.0825	21.8743	-0.596831	0.000100979			sig-lable(P value): * < 0.05; ** < 0.01
FP2-SP2	osa-miR169a	17869357	8252111	24	7	1.3431	0.8483	-0.66292	0.321081			FP3-SP3	osa-miR167j	7798691	5851620	563	291	72.1916	49.7298	-0.53772	1.58987e-07
FP2-SP2	osa-miR159c	17869357	8252111	19	25	1.0633	3.0295	1.51053	0.000509444	**		FP3-SP3	osa-miR168a-3p	7798691	5851620	9020	12696	1156.6	2169.66	0.907571	0
FP2-SP2	osa-miR169e	17869357	8252111	93	29	5.2044	3.5143	-0.566495	0.0646692			FP3-SP3	osa-miR168a-5p	7798691	5851620	20785	9666	2665.19	1651.85	-0.690156	0
FP2-SP2	osa-miR171a	17869357	8252111	32	21	1.7908	2.5448	0.506948	0.197059			FP3-SP3	osa-miR169a	7798691	5851620	16	13	2.0516	2.2216	0.11485	0.807457
FP2-SP2	osa-miR171b	17869357	8252111	1157	490	64.7477	59.3787	-0.124883	0.109263			FP3-SP3	osa-miR169b	7798691	5851620	4	6	0.5129	1.0254	0.999437	0.277614
FP2-SP2	osa-miR171c-3p	17869357	8252111	1157	490	64.7477	59.3787	-0.124883	0.109263			FP3-SP3	osa-miR169c	7798691	5851620	7	10	0.8976	1.7089	0.928923	0.186234
FP2-SP2	osa-miR159d	17869357	8252111	19	27	1.0633	3.2719	1.62158	0.000141206	**		FP3-SP3	osa-miR169e	7798691	5851620	27	24	3.4621	4.1014	0.244469	0.533666
FP2-SP2	osa-miR171d-3p	17869357	8252111	868	429	48.5748	51.9867	0.0979345	0.246138			FP3-SP3	osa-miR171a	7798691	5851620	15	25	1.9234	4.2723	1.15135	0.0128443	*
FP2-SP2	osa-miR171d-5p	17869357	8252111	351	85	19.6426	10.3004	-0.931286	1.68275e-08			FP3-SP3	osa-miR171b	7798691	5851620	597	373	76.5513	63.743	-0.26416	0.00536684
FP2-SP2	osa-miR171e-3p	17869357	8252111	869	429	48.6307	51.9867	0.0962752	0.254021			FP3-SP3	osa-miR171c-3p	7798691	5851620	597	373	76.5513	63.743	-0.26416	0.00536684
FP2-SP2	osa-miR171e-5p	17869357	8252111	420	98	23.5039	11.8757	-0.984888	9.95599e-11			FP3-SP3	osa-miR171c-5p	7798691	5851620	40	8	5.1291	1.3671	-1.90759	0.000146243	**
FP2-SP2	osa-miR171f-3p	17869357	8252111	869	428	48.6307	51.8655	0.0929078	0.271092			FP3-SP3	osa-miR171d-3p	7798691	5851620	513	313	65.7803	53.4895	-0.2984	0.00377046
FP2-SP2	osa-miR171i-3p	17869357	8252111	1227	400	68.665	48.4724	-0.502411	5.51674e-10			FP3-SP3	osa-miR171d-5p	7798691	5851620	119	64	15.259	10.9371	-0.48043	0.030898
FP2-SP2	osa-miR159e	17869357	8252111	19	25	1.0633	3.0295	1.51053	0.000509444	**		FP3-SP3	osa-miR171e-3p	7798691	5851620	512	312	65.652	53.3186	-0.3002	0.00360889
FP2-SP2	osa-miR172d-5p	17869357	8252111	35	14	1.9587	1.6965	-0.207335	0.705799			FP3-SP3	osa-miR171e-5p	7798691	5851620	135	38	17.3106	6.4939	-1.4145	9.53819e-09	**
FP2-SP2	osa-miR1846a-3p	17869357	8252111	69	45	3.8614	5.4532	0.497979	0.0695578			FP3-SP3	osa-miR171f-3p	7798691	5851620	515	316	66.0367	54.0021	-0.290253	0.00469586
FP2-SP2	osa-miR166e-3p	17869357	8252111	124	28	6.9393	3.3931	-1.03219	0.000310792	**		FP3-SP3	osa-miR171i-3p	7798691	5851620	670	484	85.9119	82.7121	-0.0547596	0.528106
FP2-SP2	osa-miR1846b-3p	17869357	8252111	74	40	4.1412	4.8472	0.227103	0.400847			FP3-SP3	osa-miR171i-5p	7798691	5851620	256	110	32.826	18.7982	-0.804244	4.93364e-07
FP2-SP2	osa-miR171c-5p	17869357	8252111	163	16	9.1218	1.9389	-2.23408	6.58058e-13	**		FP3-SP3	osa-miR172d-5p	7798691	5851620	8	17	1.0258	2.9052	1.50189	0.0120382	*
FP2-SP2	osa-miR171i-5p	17869357	8252111	666	88	37.2705	10.6639	-1.8053	1.33635e-37	**		FP3-SP3	osa-miR1846a-3p	7798691	5851620	49	24	6.2831	4.1014	-0.61536	0.0870458
FP2-SP2	osa-miR1846d-3p	17869357	8252111	25	15	1.399	1.8177	0.377718	0.389068			FP3-SP3	osa-miR1846a-5p	7798691	5851620	50	33	6.4113	5.6395	-0.18505	0.582913
FP2-SP2	osa-miR1846d-5p	17869357	8252111	66	17	3.6935	2.0601	-0.842274	0.0288366			FP3-SP3	osa-miR1846b-3p	7798691	5851620	48	30	6.1549	5.1268	-0.263677	0.445722
FP2-SP2	osa-miR1846e	17869357	8252111	135	71	7.5548	8.6039	0.187597	0.360464			FP3-SP3	osa-miR1846b-5p	7798691	5851620	49	32	6.2831	5.4686	-0.200305	0.556634
FP2-SP2	osa-miR1849	17869357	8252111	56	13	3.1339	1.5754	-0.992241	0.0216202			FP3-SP3	osa-miR1846c-5p	7798691	5851620	40	23	5.1291	3.9305	-0.383993	0.320239
FP2-SP2	osa-miR1850.1	17869357	8252111	37	15	2.0706	1.8177	-0.187935	0.725655			FP3-SP3	osa-miR1846d-3p	7798691	5851620	15	5	1.9234	0.8545	-1.17051	0.116597
FP2-SP2	osa-miR1859	17869357	8252111	1171	382	65.5312	46.2912	-0.501444	1.45626e-09			FP3-SP3	osa-miR1846d-5p	7798691	5851620	32	18	4.1033	3.0761	-0.415682	0.341777
FP2-SP2	osa-miR1862d	17869357	8252111	366	188	20.482	22.782	0.153538	0.230115			FP3-SP3	osa-miR1846e	7798691	5851620	28	42	3.5903	7.1775	0.999377	0.00402491
FP2-SP2	osa-miR1862e	17869357	8252111	118	29	6.6035	3.5143	-0.909994	0.00153096			FP3-SP3	osa-miR1849	7798691	5851620	37	21	4.7444	3.5887	-0.402764	0.318496
FP2-SP2	osa-miR1863c	17869357	8252111	23	9	1.2871	1.0906	-0.239002	0.74529			FP3-SP3	osa-miR1850.1	7798691	5851620	17	7	2.1799	1.1962	-0.865803	0.190134
FP2-SP2	osa-miR1868	17869357	8252111	4822	1581	269.847	191.587	-0.494142	6.62294e-34			FP3-SP3	osa-miR1859	7798691	5851620	289	142	37.0575	24.2668	-0.610782	2.63656e-05
FP2-SP2	osa-miR1870-5p	17869357	8252111	31	19	1.7348	2.3024	0.408369	0.307492			FP3-SP3	osa-miR1861e	7798691	5851620	10	2	1.2823	0.3418	-1.90751	0.0755432
FP2-SP2	osa-miR1846a-5p	17869357	8252111	74	74	4.1412	8.9674	1.11464	3.0612e-06	**		FP3-SP3	osa-miR1861k	7798691	5851620	10	2	1.2823	0.3418	-1.90751	0.0755432
FP2-SP2	osa-miR1876	17869357	8252111	3410	1783	190.829	216.066	0.179187	2.35712e-05			FP3-SP3	osa-miR1861m	7798691	5851620	10	2	1.2823	0.3418	-1.90751	0.0755432
FP2-SP2	osa-miR1846b-5p	17869357	8252111	73	74	4.0852	8.9674	1.13428	2.19952e-06	**		FP3-SP3	osa-miR1862d	7798691	5851620	221	113	28.3381	19.3109	-0.553328	0.000779869
FP2-SP2	osa-miR1879	17869357	8252111	120	95	6.7154	11.5122	0.777618	0.000101713			FP3-SP3	osa-miR1862e	7798691	5851620	89	25	11.4122	4.2723	-1.41749	3.29943e-06	**
FP2-SP2	osa-miR1880	17869357	8252111	95	62	5.3164	7.5132	0.498978	0.0338744			FP3-SP3	osa-miR1863b.2	7798691	5851620	4	9	0.5129	1.538	1.58431	0.0594636
FP2-SP2	osa-miR1846c-5p	17869357	8252111	58	57	3.2458	6.9073	1.08955	5.68194e-05	**		FP3-SP3	osa-miR1868	7798691	5851620	1551	976	198.88	166.791	-0.25385	1.5052e-05
FP2-SP2	osa-miR1871	17869357	8252111	43	6	2.4064	0.7271	-1.72665	0.00240731	**		FP3-SP3	osa-miR1870-5p	7798691	5851620	9	12	1.154	2.0507	0.829473	0.187425
FP2-SP2	osa-miR2055	17869357	8252111	44	24	2.4623	2.9083	0.24017	0.47924			FP3-SP3	osa-miR1871	7798691	5851620	9	8	1.154	1.3671	0.244476	0.702712
FP2-SP2	osa-miR2106	17869357	8252111	200	51	11.1923	6.1802	-0.856781	7.69868e-05			FP3-SP3	osa-miR1876	7798691	5851620	2396	1120	307.231	191.4	-0.682733	6.46817e-41
FP2-SP2	osa-miR2118a	17869357	8252111	248	112	13.8785	13.5723	-0.0321864	0.866521			FP3-SP3	osa-miR1878	7798691	5851620	45	15	5.7702	2.5634	-1.17056	0.00469807	**
FP2-SP2	osa-miR2118b	17869357	8252111	8813	5059	493.191	613.055	0.313872	2.84675e-34			FP3-SP3	osa-miR1879	7798691	5851620	52	44	6.6678	7.5193	0.173388	0.547512
FP2-SP2	osa-miR2118c	17869357	8252111	4817	2603	269.568	315.434	0.226693	1.43771e-10			FP3-SP3	osa-miR1880	7798691	5851620	20	32	2.5645	5.4686	1.09249	0.00693713	**
FP2-SP2	osa-miR2118d	17869357	8252111	7116	4629	398.224	560.947	0.494287	1.38292e-71			FP3-SP3	osa-miR1883a	7798691	5851620	895	908	114.763	155.171	0.435201	1.58503e-10
FP2-SP2	osa-miR2118e	17869357	8252111	5843	2839	326.984	344.033	0.0733264	0.0263822			FP3-SP3	osa-miR1883b	7798691	5851620	139	206	17.8235	35.2039	0.981955	3.40598e-10
FP2-SP2	osa-miR2118f	17869357	8252111	11388	7048	637.292	854.085	0.422424	4.29209e-81			FP3-SP3	osa-miR2055	7798691	5851620	24	24	3.0774	4.1014	0.414404	0.313093
FP2-SP2	osa-miR2118g	17869357	8252111	2113	1182	118.247	143.236	0.27659	1.64464e-07			FP3-SP3	osa-miR2096-5p	7798691	5851620	3	9	0.3847	1.538	1.99925	0.0275344	*
FP2-SP2	osa-miR2118h	17869357	8252111	1240	604	69.3925	73.1934	0.0769338	0.2787			FP3-SP3	osa-miR2106	7798691	5851620	110	35	14.1049	5.9812	-1.23769	2.98783e-06	**
FP2-SP2	osa-miR2118i	17869357	8252111	621	423	34.7522	51.2596	0.560718	1.16496e-09			FP3-SP3	osa-miR2118a	7798691	5851620	113	120	14.4896	20.5071	0.501106	0.00796318
FP2-SP2	osa-miR2118j	17869357	8252111	11384	7044	637.068	853.6	0.422112	6.12445e-81			FP3-SP3	osa-miR2118b	7798691	5851620	3642	4190	467.001	716.041	0.616615	1.39931e-79
FP2-SP2	osa-miR2118k	17869357	8252111	1243	605	69.5604	73.3146	0.0758343	0.285081			FP3-SP3	osa-miR2118c	7798691	5851620	1742	1728	223.371	295.303	0.402754	2.22275e-16
FP2-SP2	osa-miR2118l	17869357	8252111	151	54	8.4502	6.5438	-0.368857	0.109351			FP3-SP3	osa-miR2118d	7798691	5851620	3561	3493	456.615	596.929	0.38658	2.8448e-29
FP2-SP2	osa-miR2118m	17869357	8252111	11355	7032	635.445	852.146	0.423332	3.12083e-81			FP3-SP3	osa-miR2118e	7798691	5851620	2920	2845	374.422	486.19	0.376856	4.25374e-23
FP2-SP2	osa-miR2118n	17869357	8252111	8814	5059	493.247	613.055	0.313708	3.06683e-34			FP3-SP3	osa-miR2118f	7798691	5851620	7712	5559	988.884	949.993	-0.0578838	0.0225463
FP2-SP2	osa-miR2118o	17869357	8252111	10462	5496	585.471	666.011	0.185948	1.50793e-14			FP3-SP3	osa-miR2118g	7798691	5851620	1531	1519	196.315	259.586	0.403043	1.33585e-14
FP2-SP2	osa-miR2118p	17869357	8252111	4007	2550	224.239	309.012	0.462627	8.38871e-36			FP3-SP3	osa-miR2118h	7798691	5851620	756	501	96.9393	85.6173	-0.179179	0.0309399
FP2-SP2	osa-miR2118q	17869357	8252111	4817	2603	269.568	315.434	0.226693	1.43771e-10			FP3-SP3	osa-miR2118i	7798691	5851620	343	386	43.9817	65.9646	0.584789	4.54018e-08
FP2-SP2	osa-miR2118r	17869357	8252111	5842	2839	326.928	344.033	0.0735731	0.0258862			FP3-SP3	osa-miR2118j	7798691	5851620	7712	5559	988.884	949.993	-0.0578838	0.0225463
FP2-SP2	osa-miR1878	17869357	8252111	106	15	5.9319	1.8177	-1.70638	1.23224e-06	**		FP3-SP3	osa-miR2118k	7798691	5851620	757	501	97.0676	85.6173	-0.181087	0.0291419
FP2-SP2	osa-miR1883a	17869357	8252111	1926	1895	107.782	229.638	1.09124	5.97247e-118	**		FP3-SP3	osa-miR2118l	7798691	5851620	40	57	5.1291	9.7409	0.925349	0.00167548
FP2-SP2	osa-miR2275c	17869357	8252111	109	33	6.0998	3.999	-0.609123	0.0319008			FP3-SP3	osa-miR2118m	7798691	5851620	7700	5543	987.345	947.259	-0.0597956	0.0185839
FP2-SP2	osa-miR2275d	17869357	8252111	26	15	1.455	1.8177	0.321095	0.453532			FP3-SP3	osa-miR2118n	7798691	5851620	3641	4190	466.873	716.041	0.617011	1.13822e-79
FP2-SP2	osa-miR2863c	17869357	8252111	72	29	4.0292	3.5143	-0.197256	0.568058			FP3-SP3	osa-miR2118o	7798691	5851620	7057	4633	904.895	791.747	-0.192712	1.31842e-12
FP2-SP2	osa-miR1883b	17869357	8252111	518	480	28.9882	58.1669	1.00473	2.04414e-27	**		FP3-SP3	osa-miR2118p	7798691	5851620	1381	1575	177.081	269.156	0.604034	5.95764e-30
FP2-SP2	osa-miR2880	17869357	8252111	194	89	10.8566	10.7851	-0.00953281	0.983932			FP3-SP3	osa-miR2118q	7798691	5851620	1743	1728	223.499	295.303	0.401927	2.53398e-16
FP2-SP2	osa-miR319a-3p	17869357	8252111	442	211	24.7351	25.5692	0.0478473	0.677551			FP3-SP3	osa-miR2118r	7798691	5851620	2920	2845	374.422	486.19	0.376856	4.25374e-23
FP2-SP2	osa-miR319b	17869357	8252111	17833	9717	997.965	1177.52	0.238686	1.05104e-38			FP3-SP3	osa-miR2121a	7798691	5851620	21	16	2.6928	2.7343	0.0220645	0.938963
FP2-SP2	osa-miR390-3p	17869357	8252111	64	20	3.5816	2.4236	-0.563453	0.132893			FP3-SP3	osa-miR2121b	7798691	5851620	21	16	2.6928	2.7343	0.0220645	0.938963
FP2-SP2	osa-miR390-5p	17869357	8252111	1585	532	88.6993	64.4684	-0.460331	7.21815e-11			FP3-SP3	osa-miR2275a	7798691	5851620	10	8	1.2823	1.3671	0.0923849	0.861231
FP2-SP2	osa-miR393a	17869357	8252111	292	174	16.3408	21.0855	0.367773	0.00802809			FP3-SP3	osa-miR2275b	7798691	5851620	10	8	1.2823	1.3671	0.0923849	0.861231
FP2-SP2	osa-miR393b-3p	17869357	8252111	89	36	4.9806	4.3625	-0.191164	0.531309			FP3-SP3	osa-miR2275c	7798691	5851620	58	21	7.4371	3.5887	-1.05128	0.0031027	**
FP2-SP2	osa-miR393b-5p	17869357	8252111	300	187	16.7885	22.6609	0.432732	0.00139122			FP3-SP3	osa-miR2275d	7798691	5851620	21	17	2.6928	2.9052	0.10953	0.795166
FP2-SP2	osa-miR394	17869357	8252111	699	277	39.1172	33.5672	-0.220751	0.0307864			FP3-SP3	osa-miR2863c	7798691	5851620	27	18	3.4621	3.0761	-0.170545	0.721514
FP2-SP2	osa-miR2121a	17869357	8252111	86	13	4.8127	1.5754	-1.61113	2.89727e-05	**		FP3-SP3	osa-miR2867-5p	7798691	5851620	1	7	0.1282	1.1962	3.22199	0.0127057	*
FP2-SP2	osa-miR396a-5p	17869357	8252111	69	47	3.8614	5.6955	0.560698	0.0392511			FP3-SP3	osa-miR2871a-5p	7798691	5851620	21	12	2.6928	2.0507	-0.392991	0.475161
FP2-SP2	osa-miR396b-5p	17869357	8252111	69	47	3.8614	5.6955	0.560698	0.0392511			FP3-SP3	osa-miR2880	7798691	5851620	87	51	11.1557	8.7155	-0.356126	0.16435
FP2-SP2	osa-miR396c-3p	17869357	8252111	224	91	12.5354	11.0275	-0.184902	0.313443			FP3-SP3	osa-miR319a-3p	7798691	5851620	178	40	22.8243	6.8357	-1.73941	1.88336e-14	**
FP2-SP2	osa-miR396c-5p	17869357	8252111	216	74	12.0877	8.9674	-0.430778	0.02562			FP3-SP3	osa-miR319b	7798691	5851620	6271	4529	804.109	773.974	-0.0551071	0.0501363
FP2-SP2	osa-miR396d	17869357	8252111	28	15	1.5669	1.8177	0.214201	0.594196			FP3-SP3	osa-miR390-3p	7798691	5851620	36	32	4.6162	5.4686	0.244466	0.475823
FP2-SP2	osa-miR396e-5p	17869357	8252111	2295	1294	128.432	156.808	0.287996	1.24843e-08			FP3-SP3	osa-miR390-5p	7798691	5851620	516	370	66.1649	63.2304	-0.0654477	0.50935
FP2-SP2	osa-miR396f-5p	17869357	8252111	2294	1294	128.376	156.808	0.288625	1.16449e-08			FP3-SP3	osa-miR393a	7798691	5851620	209	128	26.7994	21.8743	-0.292964	0.0704752
FP2-SP2	osa-miR396g	17869357	8252111	28	15	1.5669	1.8177	0.214201	0.594196			FP3-SP3	osa-miR393b-3p	7798691	5851620	74	70	9.4888	11.9625	0.334221	0.162493
FP2-SP2	osa-miR396h	17869357	8252111	28	15	1.5669	1.8177	0.214201	0.594196			FP3-SP3	osa-miR393b-5p	7798691	5851620	216	147	27.697	25.1212	-0.140824	0.36602
FP2-SP2	osa-miR2121b	17869357	8252111	86	13	4.8127	1.5754	-1.61113	2.89727e-05	**		FP3-SP3	osa-miR394	7798691	5851620	265	258	33.9801	44.0904	0.375774	0.00290893
FP2-SP2	osa-miR2871a-5p	17869357	8252111	54	11	3.0219	1.333	-1.18078	0.00953077	**		FP3-SP3	osa-miR395i	7798691	5851620	7	9	0.8976	1.538	0.776911	0.278762
FP2-SP2	osa-miR3979-3p	17869357	8252111	10	49	0.5596	5.9379	3.40748	3.53659e-16	**		FP3-SP3	osa-miR396a-5p	7798691	5851620	48	39	6.1549	6.6648	0.114826	0.699007
FP2-SP2	osa-miR3979-5p	17869357	8252111	36	76	2.0146	9.2098	2.19268	3.55376e-15	**		FP3-SP3	osa-miR396b-5p	7798691	5851620	48	39	6.1549	6.6648	0.114826	0.699007
FP2-SP2	osa-miR397b	17869357	8252111	31	34	1.7348	4.1202	1.24795	0.000491539	**		FP3-SP3	osa-miR396c-3p	7798691	5851620	118	133	15.1307	22.7287	0.587036	0.00126387
FP2-SP2	osa-miR398b	17869357	8252111	166	486	9.2896	58.894	2.66443	4.17874e-112	**		FP3-SP3	osa-miR396c-5p	7798691	5851620	92	44	11.7969	7.5193	-0.649738	0.0129213
FP2-SP2	osa-miR399d	17869357	8252111	17	52	0.9513	6.3014	2.7277	8.68397e-14	**		FP3-SP3	osa-miR396d	7798691	5851620	32	22	4.1033	3.7596	-0.126205	0.773993
FP2-SP2	osa-miR399j	17869357	8252111	18	29	1.0073	3.5143	1.80274	2.0656e-05	**		FP3-SP3	osa-miR396e-3p	7798691	5851620	13	7	1.6669	1.1962	-0.478709	0.512706
FP2-SP2	osa-miR408-3p	17869357	8252111	317	600	17.7399	72.7087	2.03513	6.09031e-98	**		FP3-SP3	osa-miR396e-5p	7798691	5851620	2505	2116	321.208	361.609	0.170925	6.14731e-05
FP2-SP2	osa-miR444a-3p.2	17869357	8252111	566	358	31.6743	43.3828	0.45381	4.0424e-06			FP3-SP3	osa-miR396f-5p	7798691	5851620	2505	2118	321.208	361.951	0.172287	5.34484e-05
FP2-SP2	osa-miR444b.1	17869357	8252111	1490	882	83.383	106.882	0.35819	7.24492e-09			FP3-SP3	osa-miR396g	7798691	5851620	32	22	4.1033	3.7596	-0.126205	0.773993
FP2-SP2	osa-miR444b.2	17869357	8252111	921	363	51.5407	43.9887	-0.228579	0.0102007			FP3-SP3	osa-miR396h	7798691	5851620	32	22	4.1033	3.7596	-0.126205	0.773993
FP2-SP2	osa-miR444c.1	17869357	8252111	1490	882	83.383	106.882	0.35819	7.24492e-09			FP3-SP3	osa-miR3979-3p	7798691	5851620	3	38	0.3847	6.4939	4.07728	2.03919e-11	**
FP2-SP2	osa-miR444c.2	17869357	8252111	923	361	51.6527	43.7464	-0.239679	0.00711273			FP3-SP3	osa-miR3979-5p	7798691	5851620	13	107	1.6669	18.2855	3.45546	2.77363e-26	**
FP2-SP2	osa-miR444d.2	17869357	8252111	559	352	31.2826	42.6558	0.447381	6.46812e-06			FP3-SP3	osa-miR397b	7798691	5851620	18	22	2.3081	3.7596	0.703873	0.121653
FP2-SP2	osa-miR444e	17869357	8252111	553	354	30.9468	42.8981	0.471124	2.08147e-06			FP3-SP3	osa-miR3982-3p	7798691	5851620	14	15	1.7952	2.5634	0.513914	0.329975
FP2-SP2	osa-miR408-5p	17869357	8252111	12	16	0.6715	1.9389	1.52978	0.00479179	**		FP3-SP3	osa-miR398b	7798691	5851620	105	323	13.4638	55.1984	2.03554	1.09208e-42	**
FP2-SP2	osa-miR5072	17869357	8252111	33	14	1.8467	1.6965	-0.122388	0.851484			FP3-SP3	osa-miR399d	7798691	5851620	10	53	1.2823	9.0573	2.82035	1.76957e-11	**
FP2-SP2	osa-miR439i	17869357	8252111	8	13	0.4477	1.5754	1.81511	0.00394838	**		FP3-SP3	osa-miR399j	7798691	5851620	11	41	1.4105	7.0066	2.31251	1.40739e-07	**
FP2-SP2	osa-miR444f	17869357	8252111	46	58	2.5742	7.0285	1.44909	3.3672e-07	**		FP3-SP3	osa-miR408-3p	7798691	5851620	251	597	32.1849	102.023	1.66444	6.18349e-59	**
FP2-SP2	osa-miR5143a	17869357	8252111	24	13	1.3431	1.5754	0.230151	0.591469			FP3-SP3	osa-miR439i	7798691	5851620	8	7	1.0258	1.1962	0.221709	0.738933
FP2-SP2	osa-miR5143b	17869357	8252111	21	12	1.1752	1.4542	0.307319	0.508388			FP3-SP3	osa-miR444a-3p.2	7798691	5851620	311	354	39.8785	60.4961	0.601231	7.89253e-08
FP2-SP2	osa-miR5144-3p	17869357	8252111	71	25	3.9733	3.0295	-0.391258	0.259484			FP3-SP3	osa-miR444b.1	7798691	5851620	709	455	90.9127	77.7562	-0.225524	0.00908162
FP2-SP2	osa-miR5144-5p	17869357	8252111	378	142	21.1535	17.2077	-0.297842	0.0354606			FP3-SP3	osa-miR444b.2	7798691	5851620	459	352	58.856	60.1543	0.0314784	0.753277
FP2-SP2	osa-miR5145	17869357	8252111	37	23	2.0706	2.7872	0.428768	0.246021			FP3-SP3	osa-miR444c.1	7798691	5851620	709	455	90.9127	77.7562	-0.225524	0.00908162
FP2-SP2	osa-miR5148a	17869357	8252111	75	43	4.1971	5.2108	0.312112	0.24563			FP3-SP3	osa-miR444c.2	7798691	5851620	460	348	58.9843	59.4707	0.0118481	0.902697
FP2-SP2	osa-miR5148b	17869357	8252111	77	44	4.3091	5.332	0.30729	0.247296			FP3-SP3	osa-miR444d.2	7798691	5851620	306	350	39.2374	59.8125	0.608218	6.85496e-08
FP2-SP2	osa-miR5148c	17869357	8252111	77	43	4.3091	5.2108	0.274118	0.302548			FP3-SP3	osa-miR444d.3	7798691	5851620	9	3	1.154	0.5127	-1.17046	0.242494
FP2-SP2	osa-miR5150-3p	17869357	8252111	97	27	5.4283	3.2719	-0.730372	0.0177749			FP3-SP3	osa-miR444e	7798691	5851620	302	348	38.7244	59.4707	0.618936	4.64233e-08
FP2-SP2	osa-miR5150-5p	17869357	8252111	19	8	1.0633	0.9694	-0.133385	0.908417			FP3-SP3	osa-miR444f	7798691	5851620	23	67	2.9492	11.4498	1.95693	1.38279e-09	**
FP2-SP2	osa-miR5083	17869357	8252111	235	29	13.151	3.5143	-1.90386	4.39912e-15	**		FP3-SP3	osa-miR5072	7798691	5851620	19	4	2.4363	0.6836	-1.83347	0.0128629	*
FP2-SP2	osa-miR528-3p	17869357	8252111	85	101	4.7567	12.2393	1.36349	1.47988e-10	**		FP3-SP3	osa-miR5083	7798691	5851620	28	38	3.5903	6.4939	0.854981	0.0163826
FP2-SP2	osa-miR529a	17869357	8252111	796	224	44.5455	27.1446	-0.714614	9.23871e-12			FP3-SP3	osa-miR5144-3p	7798691	5851620	33	14	4.2315	2.3925	-0.82265	0.0726478
FP2-SP2	osa-miR529b	17869357	8252111	17	11	0.9513	1.333	0.486704	0.348427			FP3-SP3	osa-miR5144-5p	7798691	5851620	169	152	21.6703	25.9757	0.261443	0.104126
FP2-SP2	osa-miR528-5p	17869357	8252111	199	392	11.1364	47.503	2.09274	4.16775e-67	**		FP3-SP3	osa-miR5145	7798691	5851620	8	11	1.0258	1.8798	0.87383	0.187409
FP2-SP2	osa-miR535-3p	17869357	8252111	1015	312	56.8011	37.8085	-0.587208	8.81507e-11			FP3-SP3	osa-miR5148a	7798691	5851620	23	13	2.9492	2.2216	-0.408725	0.435092
FP2-SP2	osa-miR535-5p	17869357	8252111	1580	769	88.4195	93.1883	0.0757843	0.229536			FP3-SP3	osa-miR5148b	7798691	5851620	23	13	2.9492	2.2216	-0.408725	0.435092
FP2-SP2	osa-miR5486	17869357	8252111	255	191	14.2702	23.1456	0.697732	6.00405e-07			FP3-SP3	osa-miR5148c	7798691	5851620	23	14	2.9492	2.3925	-0.301805	0.561517
FP2-SP2	osa-miR5487	17869357	8252111	22	15	1.2312	1.8177	0.562049	0.225601			FP3-SP3	osa-miR5150-3p	7798691	5851620	41	34	5.2573	5.8104	0.144315	0.653329
FP2-SP2	osa-miR5493	17869357	8252111	24	7	1.3431	0.8483	-0.66292	0.321081			FP3-SP3	osa-miR5150-5p	7798691	5851620	12	8	1.5387	1.3671	-0.170593	0.833386
FP2-SP2	osa-miR5496	17869357	8252111	304	150	17.0124	18.1772	0.0955433	0.493389			FP3-SP3	osa-miR5153	7798691	5851620	5	6	0.6411	1.0254	0.677565	0.427239
FP2-SP2	osa-miR5497	17869357	8252111	401	324	22.4407	39.2627	0.807042	1.55382e-13			FP3-SP3	osa-miR528-3p	7798691	5851620	74	105	9.4888	17.9437	0.91918	2.22827e-05
FP2-SP2	osa-miR5504	17869357	8252111	62	16	3.4696	1.9389	-0.839531	0.0350626			FP3-SP3	osa-miR528-5p	7798691	5851620	137	267	17.5671	45.6284	1.37706	6.06667e-21	**
FP2-SP2	osa-miR530-5p	17869357	8252111	15	24	0.8394	2.9083	1.79275	0.0001124	**		FP3-SP3	osa-miR529a	7798691	5851620	257	231	32.9542	39.4762	0.260521	0.0462089
FP2-SP2	osa-miR5508	17869357	8252111	81	30	4.5329	3.6354	-0.31832	0.321024			FP3-SP3	osa-miR529b	7798691	5851620	3	10	0.3847	1.7089	2.15126	0.0147627	*
FP2-SP2	osa-miR5509	17869357	8252111	174	94	9.7373	11.391	0.226301	0.213334			FP3-SP3	osa-miR530-5p	7798691	5851620	11	33	1.4105	5.6395	1.99936	1.73059e-05	**
FP2-SP2	osa-miR5515	17869357	8252111	21	7	1.1752	0.8483	-0.47026	0.516791			FP3-SP3	osa-miR535-3p	7798691	5851620	511	375	65.5238	64.0848	-0.0320368	0.748904
FP2-SP2	osa-miR5516a	17869357	8252111	135	71	7.5548	8.6039	0.187597	0.360464			FP3-SP3	osa-miR535-5p	7798691	5851620	602	533	77.1924	91.0859	0.238769	0.0054239
FP2-SP2	osa-miR5516b	17869357	8252111	135	71	7.5548	8.6039	0.187597	0.360464			FP3-SP3	osa-miR5486	7798691	5851620	80	75	10.2581	12.817	0.321295	0.163732
FP2-SP2	osa-miR5518	17869357	8252111	18	8	1.0073	0.9694	-0.0553294	0.989107			FP3-SP3	osa-miR5487	7798691	5851620	7	6	0.8976	1.0254	0.192042	0.779605
FP2-SP2	osa-miR5519	17869357	8252111	28	37	1.5669	4.4837	1.51678	2.34476e-05	**		FP3-SP3	osa-miR5493	7798691	5851620	15	7	1.9234	1.1962	-0.6852	0.32029
FP2-SP2	osa-miR5521	17869357	8252111	47	31	2.6302	3.7566	0.514255	0.117587			FP3-SP3	osa-miR5496	7798691	5851620	116	113	14.8743	19.3109	0.376594	0.0478596
FP2-SP2	osa-miR5530	17869357	8252111	21	9	1.1752	1.0906	-0.107784	0.928976			FP3-SP3	osa-miR5497	7798691	5851620	162	218	20.7727	37.2546	0.84273	1.39693e-08
FP2-SP2	osa-miR5791	17869357	8252111	74	38	4.1412	4.6049	0.153121	0.565189			FP3-SP3	osa-miR5504	7798691	5851620	17	13	2.1799	2.2216	0.0273371	0.932241
FP2-SP2	osa-miR5792	17869357	8252111	40	14	2.2385	1.6965	-0.399971	0.407579			FP3-SP3	osa-miR5508	7798691	5851620	85	24	10.8993	4.1014	-1.41005	6.02343e-06	**
FP2-SP2	osa-miR5793	17869357	8252111	699	323	39.1172	39.1415	0.00089594	0.979485			FP3-SP3	osa-miR5509	7798691	5851620	46	42	5.8984	7.1775	0.283158	0.351455
FP2-SP2	osa-miR5794	17869357	8252111	54	13	3.0219	1.5754	-0.939738	0.0313498			FP3-SP3	osa-miR5511	7798691	5851620	6	8	0.7694	1.3671	0.829313	0.280722
FP2-SP2	osa-miR5796	17869357	8252111	182	188	10.185	22.782	1.16145	1.70164e-14	**		FP3-SP3	osa-miR5515	7798691	5851620	9	2	1.154	0.3418	-1.75542	0.11407
FP2-SP2	osa-miR5806	17869357	8252111	326	106	18.2435	12.8452	-0.506153	0.00139141			FP3-SP3	osa-miR5516a	7798691	5851620	66	54	8.463	9.2282	0.12488	0.62685
FP2-SP2	osa-miR5818	17869357	8252111	791	437	44.2657	52.9561	0.258608	0.002759			FP3-SP3	osa-miR5516b	7798691	5851620	66	54	8.463	9.2282	0.12488	0.62685
FP2-SP2	osa-miR5836	17869357	8252111	993	745	55.57	90.2799	0.700099	6.13854e-23			FP3-SP3	osa-miR5519	7798691	5851620	19	25	2.4363	4.2723	0.810321	0.0627035
FP2-SP2	osa-miR6249a	17869357	8252111	3	10	0.1679	1.2118	2.85148	0.000819303	**		FP3-SP3	osa-miR5521	7798691	5851620	10	11	1.2823	1.8798	0.551845	0.371966
FP2-SP2	osa-miR6249b	17869357	8252111	3	10	0.1679	1.2118	2.85148	0.000819303	**		FP3-SP3	osa-miR5530	7798691	5851620	5	6	0.6411	1.0254	0.677565	0.427239
FP2-SP2	osa-miR7693-3p	17869357	8252111	41	43	2.2944	5.2108	1.18339	0.000177959	**		FP3-SP3	osa-miR5536	7798691	5851620	8	6	1.0258	1.0254	-0.00056267	0.96097
FP2-SP2	osa-miR7693-5p	17869357	8252111	41	49	2.2944	5.9379	1.37184	6.88712e-06	**		FP3-SP3	osa-miR5791	7798691	5851620	35	40	4.4879	6.8357	0.607049	0.0676013
FP2-SP2	osa-miR7694-3p	17869357	8252111	51	6	2.854	0.7271	-1.97276	0.000279487	**		FP3-SP3	osa-miR5792	7798691	5851620	74	44	9.4888	7.5193	-0.335627	0.226711
FP2-SP2	osa-miR812a	17869357	8252111	47	32	2.6302	3.8778	0.560066	0.0865895			FP3-SP3	osa-miR5793	7798691	5851620	137	105	17.5671	17.9437	0.0306014	0.860745
FP2-SP2	osa-miR812b	17869357	8252111	49	29	2.7421	3.5143	0.357956	0.272617			FP3-SP3	osa-miR5794	7798691	5851620	38	11	4.8726	1.8798	-1.37411	0.00338755	**
FP2-SP2	osa-miR812c	17869357	8252111	39	27	2.1825	3.2719	0.584147	0.100709			FP3-SP3	osa-miR5796	7798691	5851620	47	107	6.0267	18.2855	1.60126	2.86534e-11	**
FP2-SP2	osa-miR812d	17869357	8252111	45	29	2.5183	3.5143	0.480787	0.153113			FP3-SP3	osa-miR5806	7798691	5851620	87	70	11.1557	11.9625	0.100738	0.6542
FP2-SP2	osa-miR812e	17869357	8252111	69	43	3.8614	5.2108	0.432381	0.118061			FP3-SP3	osa-miR5818	7798691	5851620	237	245	30.3897	41.8687	0.46229	0.000436309
FP2-SP2	osa-miR812k	17869357	8252111	153	33	8.5621	3.999	-1.09833	2.39857e-05	**		FP3-SP3	osa-miR5836	7798691	5851620	350	310	44.8793	52.9768	0.239311	0.0333692
FP2-SP2	osa-miR812l	17869357	8252111	136	22	7.6108	2.666	-1.51337	3.96616e-07	**		FP3-SP3	osa-miR7693-3p	7798691	5851620	23	21	2.9492	3.5887	0.283138	0.503587
FP2-SP2	osa-miR812m	17869357	8252111	136	24	7.6108	2.9083	-1.38787	1.93486e-06	**		FP3-SP3	osa-miR7693-5p	7798691	5851620	23	12	2.9492	2.0507	-0.524207	0.323501
FP2-SP2	osa-miR812n-3p	17869357	8252111	333	205	18.6353	24.8421	0.414749	0.0013017			FP3-SP3	osa-miR7694-3p	7798691	5851620	15	10	1.9234	1.7089	-0.170591	0.805629
FP2-SP2	osa-miR812n-5p	17869357	8252111	254	106	14.2143	12.8452	-0.146114	0.39407			FP3-SP3	osa-miR812a	7798691	5851620	14	22	1.7952	3.7596	1.06643	0.0282246	*
FP2-SP2	osa-miR812p	17869357	8252111	24	11	1.3431	1.333	-0.0108899	0.946015			FP3-SP3	osa-miR812b	7798691	5851620	12	21	1.5387	3.5887	1.22175	0.0169121	*
FP2-SP2	osa-miR812t	17869357	8252111	44	19	2.4623	2.3024	-0.096868	0.859621			FP3-SP3	osa-miR812c	7798691	5851620	15	16	1.9234	2.7343	0.507513	0.320245
FP2-SP2	osa-miR812u	17869357	8252111	43	20	2.4064	2.4236	0.0102751	0.926597			FP3-SP3	osa-miR812d	7798691	5851620	10	19	1.2823	3.247	1.34037	0.0146986	*
FP2-SP2	osa-miR812v	17869357	8252111	119	47	6.6594	5.6955	-0.22557	0.382825			FP3-SP3	osa-miR812e	7798691	5851620	23	32	2.9492	5.4686	0.890848	0.0225546
FP2-SP2	osa-miR815a	17869357	8252111	14	19	0.7835	2.3024	1.55513	0.00190128	**		FP3-SP3	osa-miR812k	7798691	5851620	77	27	9.8735	4.6141	-1.09751	0.000397581	**
FP2-SP2	osa-miR815b	17869357	8252111	29	23	1.6229	2.7872	0.780242	0.0505663			FP3-SP3	osa-miR812l	7798691	5851620	64	21	8.2065	3.5887	-1.19331	0.000575208	**
FP2-SP2	osa-miR815c	17869357	8252111	17	24	0.9513	2.9083	1.6122	0.000348741	**		FP3-SP3	osa-miR812m	7798691	5851620	65	21	8.3347	3.5887	-1.21567	0.000429078	**
FP2-SP2	osa-miR818d	17869357	8252111	50	39	2.7981	4.7261	0.756203	0.0141893			FP3-SP3	osa-miR812n-3p	7798691	5851620	111	135	14.2332	23.0705	0.696789	0.000154218
FP2-SP2	osa-miR820a	17869357	8252111	901	382	50.4215	46.2912	-0.123301	0.163849			FP3-SP3	osa-miR812n-5p	7798691	5851620	96	69	12.3098	11.7916	-0.0620478	0.797272
FP2-SP2	osa-miR820b	17869357	8252111	919	396	51.4288	47.9877	-0.0999118	0.253405			FP3-SP3	osa-miR812p	7798691	5851620	17	8	2.1799	1.3671	-0.673143	0.293882
FP2-SP2	osa-miR820c	17869357	8252111	901	382	50.4215	46.2912	-0.123301	0.163849			FP3-SP3	osa-miR812t	7798691	5851620	14	8	1.7952	1.3671	-0.393026	0.572499
sig-lable(P value): * < 0.05; ** < 0.01												FP3-SP3	osa-miR812u	7798691	5851620	12	9	1.5387	1.538	-0.00065647	0.968048
												FP3-SP3	osa-miR812v	7798691	5851620	34	33	4.3597	5.6395	0.371338	0.28674
												FP3-SP3	osa-miR815a	7798691	5851620	9	9	1.154	1.538	0.414412	0.52658
												FP3-SP3	osa-miR815b	7798691	5851620	14	10	1.7952	1.7089	-0.0710766	0.938084
												FP3-SP3	osa-miR815c	7798691	5851620	10	10	1.2823	1.7089	0.414334	0.506117
												FP3-SP3	osa-miR818d	7798691	5851620	31	34	3.975	5.8104	0.547683	0.12393
												FP3-SP3	osa-miR820a	7798691	5851620	308	221	39.4938	37.7673	-0.0644885	0.617973
												FP3-SP3	osa-miR820b	7798691	5851620	314	228	40.2632	38.9636	-0.0473349	0.712322
												FP3-SP3	osa-miR820c	7798691	5851620	308	221	39.4938	37.7673	-0.0644885	0.617973
												FP3-SP3	osa-miR827	7798691	5851620	14	27	1.7952	4.6141	1.3619	0.00318879	**
												sig-lable(P value): * < 0.05; ** < 0.01
